# Supplementary material for: Reciprocal regulation of the Il9 locus by counteracting activities of transcription factors IRF1 and IRF4
Source: PubMed Central journal article supplement (PMC5437292; doi:10.1038/ncomms15366), 2017-05-12
Supplement: ncomms15366-s1.pdf [file ncomms15366-s1.pdf]

## Supplementary Figure 1

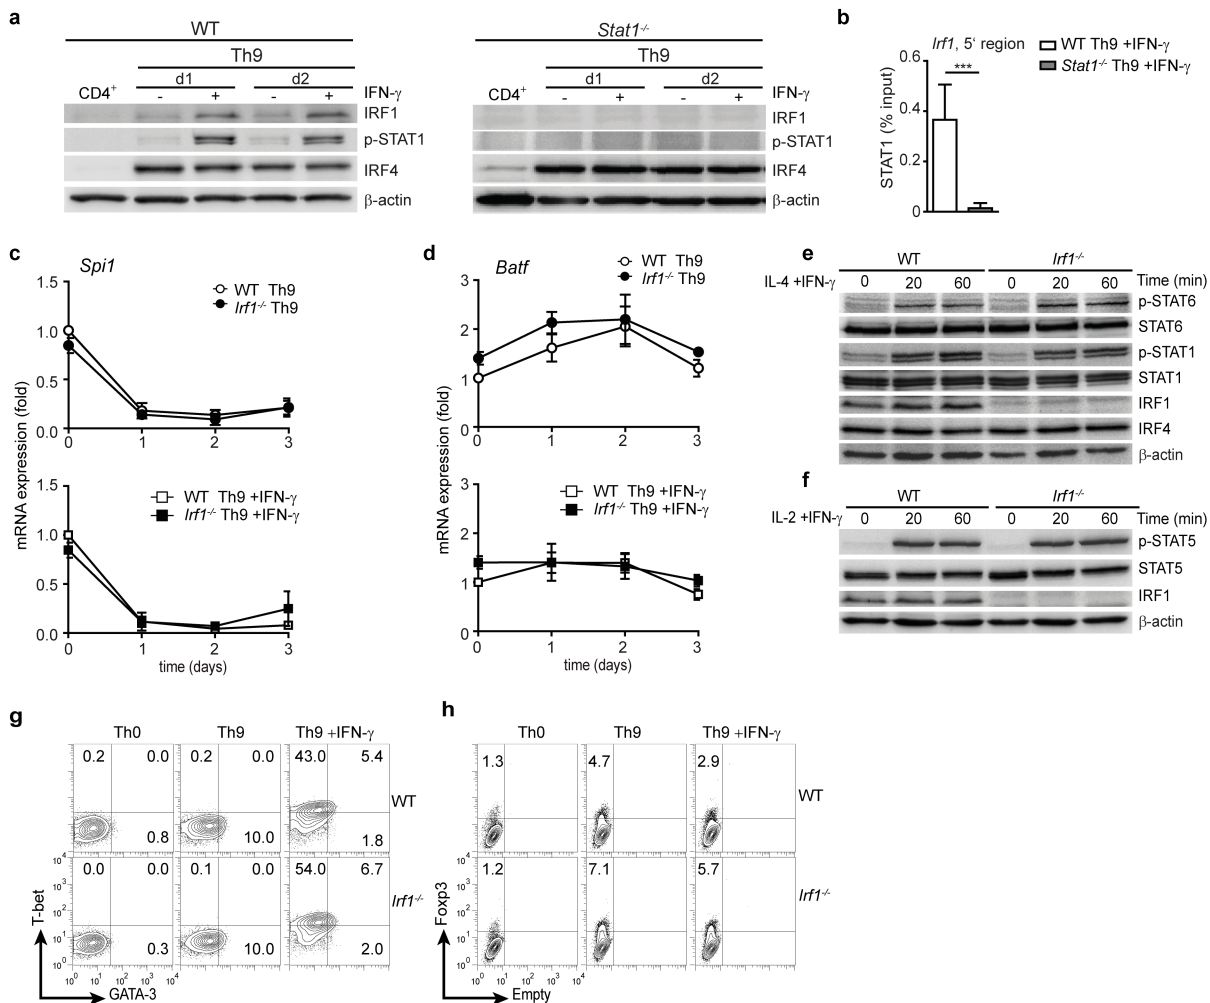

**Supplementary Figure 1. IFN- $\gamma$ /STAT1-induced IRF1 does not affect expression of Th9-related transcription factors.** Purified CD4<sup>+</sup> T cells (**a,b,e,f**) or sorted naïve CD44<sup>+</sup>CD62L<sup>+</sup>CD4<sup>+</sup> T cells (**c,d,g,h**) were isolated from WT, *lrf1*<sup>-/-</sup> or *Stat1*<sup>-/-</sup> mice and then treated under Th9 (TGF- $\beta$ +IL-4) or Th0 (without skewing cytokines) conditions with/without IFN- $\gamma$  as indicated. (**a**) Immunoblot analysis of indicated proteins in CD4<sup>+</sup> T cells untreated or stimulated as indicated for one or two days (d1, d2). (**b**) ChIP analysis of STAT1 occupancy at the *lrf1* 5' proximal promoter in WT or *Stat1*<sup>-/-</sup> T cells stimulated for 13 h under Th9 conditions in the presence or absence of IFN- $\gamma$  (n=5, mean  $\pm$ SD of percent input with subtraction of control IgG). Data are combined from two independent experiments. (**c,d**) Kinetic expression of *Spi1* (**c**) and *Batf* (**d**) mRNA (qRT-PCR). mRNA expression was normalized to *Hprt1* and relative expression was calculated by setting of the value for WT naïve CD4<sup>+</sup> T cells at the time point 0 to 1. Data represent three individual experiments combined (mean  $\pm$ SD). (**e,f**) Immunoblot analysis for the indicated proteins in Th9 cells, harvested after two days, rested in cytokine-free medium for 8 h and then treated for indicated time periods with IFN- $\gamma$  in combination with rIL-4 (**e**) or with rhIL-2 (**f**). (**g,h**) Flow cytometric analysis of cells intracellularly stained for T-bet and GATA3 (**g**) or Foxp3 (**h**) on day two of culture. (**a,e-h**) Results are representative of three independent experiments. \*\*\*p<0.001, 2-tailed Student's t test

## Supplementary Figure 2

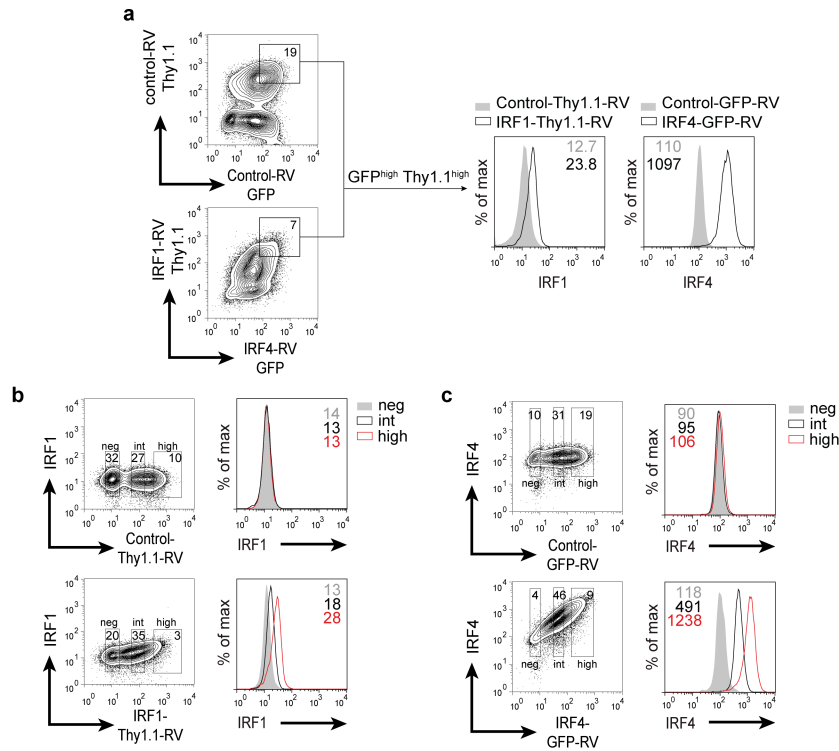

**Supplementary Figure 2. The relative intensity of GFP- and Thy1.1-tags represents the relative expression of IRF4 and IRF1 in *Lrf4*<sup>-/-</sup> Th9 cells upon IRF4-GFP-RV and IRF1-Thy1.1-RV double overexpression.** *Lrf4*<sup>-/-</sup> CD4<sup>+</sup> T cells were activated under Th0 condition overnight and spin-infected with the following retroviruses as indicated: control-GFP-RV, IRF4-GFP-RV, control-Thy1.1-RV and IRF1-Thy1.1-RV. Thereafter, cells were cultured under Th9 conditions for two further days, rested for three days and restimulated under Th9 conditions for additional two days. **(a)** Highly double positive cells (GFP<sup>hi</sup>Thy1.1<sup>hi</sup>) were selected for further analysis of IRF1 and IRF4 expression. **(b,c)** Three subsets (neg, int, high) of cells expressing increasing levels of GFP and Thy1.1 were selected for analysis of IRF1 **(b)** and IRF4 **(c)** expression by each subset. **(a-c)** Numbers in gates represent % of gated cells, whereas numbers in histograms give the mean fluorescence intensity (MFI). Data are representative of three independent experiments.

### Supplementary Figure 3

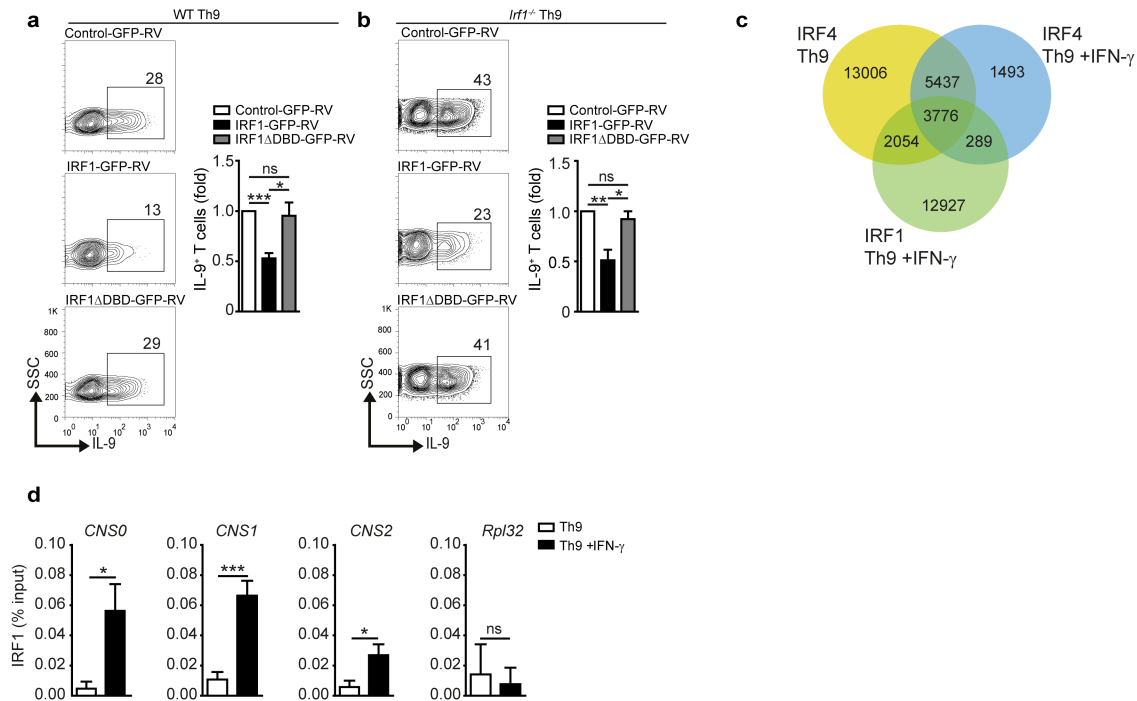

**Supplementary Figure 3. IRF1 directly binds to the *I/9* locus and DBD-dependently suppresses IL-9 production in Th9 cells.** (a) WT or (b) *Irf1*<sup>-/-</sup> CD4<sup>+</sup> T cells were cultured under Th0 condition over night and then spin-infected with the following retroviruses as indicated: control-GFP-RV, IRF1-GFP-RV, IRF1 $\Delta$ DBD. Thereafter, cells were cultured under Th9 conditions for further two days, rested for three days and restimulated under Th9 conditions for additional two days. Highly GFP-expressing cells were selected for further analysis of IL-9 production. Contour-plots show one representative of three independent experiments. Bars to the right give three independent experiments combined and give mean  $\pm$ SD. (c) Venn diagram of IRF1 and IRF4 peaks in Th9 cells in absence or presence of IFN- $\gamma$  as indicated. (d) ChIP analysis of IRF1 occupancy at the indicated loci (CNS0,1,2 of the *I/9* locus) in WT CD4<sup>+</sup> T cells stimulated for 13 h under Th9 conditions with or without IFN- $\gamma$  (three independent experiments combined, mean  $\pm$ SD of percent input with subtraction of control IgG). \* $p$ <0.05, \*\* $p$ <0.005, \*\*\* $p$ <0.001 (2-tailed Student's t test).

## Supplementary Figure 4

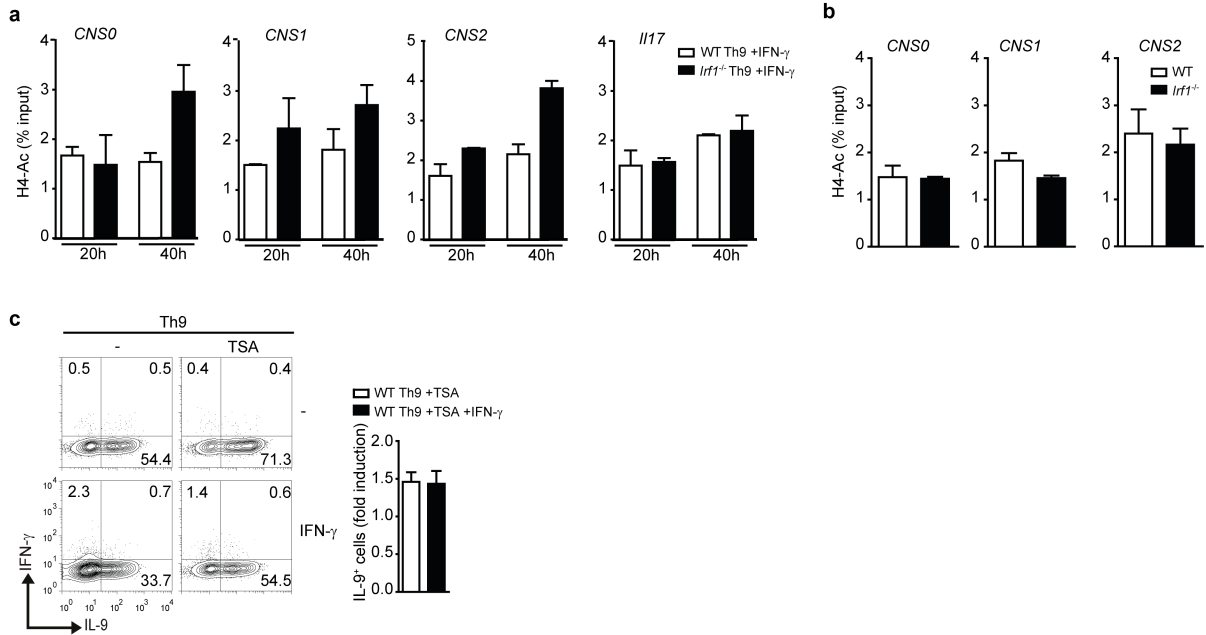

**Supplementary Figure 4. IRF1 suppresses the acetylation of histone H4 at *I17* CNSs independently of HDAC recruitment.** (a,b) ChIP assays of acetylated (Ac) histone H4 at CNSs of the *I17* gene. (a) WT and *Irf1*<sup>-/-</sup> CD4<sup>+</sup> T cells were (a) cultured for 20 or 40 h under Th9 conditions with or without IFN- $\gamma$  or (b) were directly analyzed. (a,b) The same chromatin was used for control ChIP experiments with control IgG. Precipitated DNA is presented relative to input (% input). Values for nonspecific binding (as determined by using control IgG) were subtracted. (c) WT CD4<sup>+</sup> T cells were cultured under Th9 condition with/without IFN- $\gamma$  or TSA (1 nM) for two days and then analyzed for IL-9 and IFN- $\gamma$  levels by flow cytometry. Bars to the right show fold induction of IL-9<sup>+</sup> T cells relative to non-TSA-treated cells and are combined from three independent experiments, mean  $\pm$ SD. (a-c) Data and contour-plot are representative for three independent experiments.

## Supplementary Figure 5

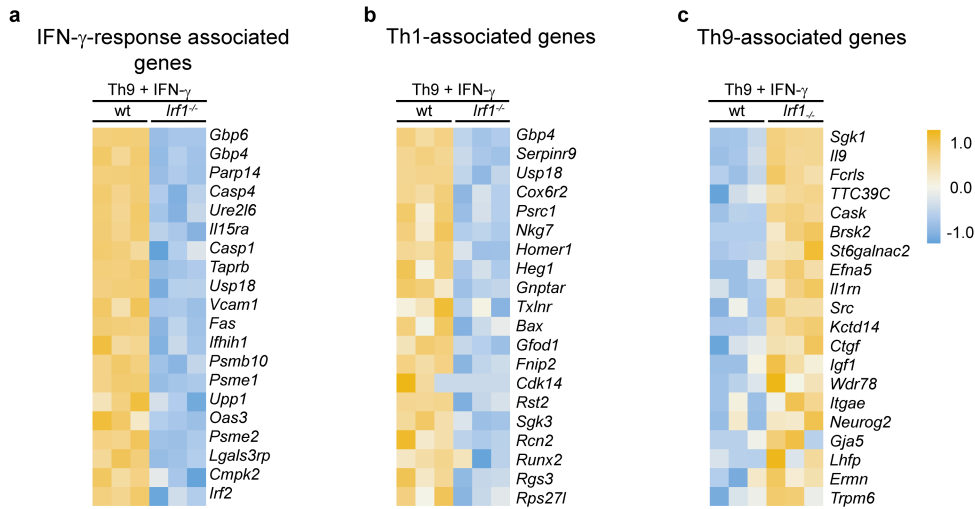

**Supplementary Figure 5. IRF1 modulates the fate of Th9 cells towards IFN/Th1 gene signature.** Naïve CD4<sup>+</sup> T cells isolated from WT and *Irf1*<sup>-/-</sup> mice were cultured under Th9 conditions in the presence of IFN- $\gamma$ . Total RNA was purified from the cells and RNA-Seq was performed from three independent biological samples. Heatmap is color-coded by z-score. Displayed are top 20 core enriched hits of each GSEA of (a) 'Hallmark IFN- $\gamma$  response', (b) 'Th1-associated' or (c) 'Th9-associated genes'.

## Supplementary Figure 6

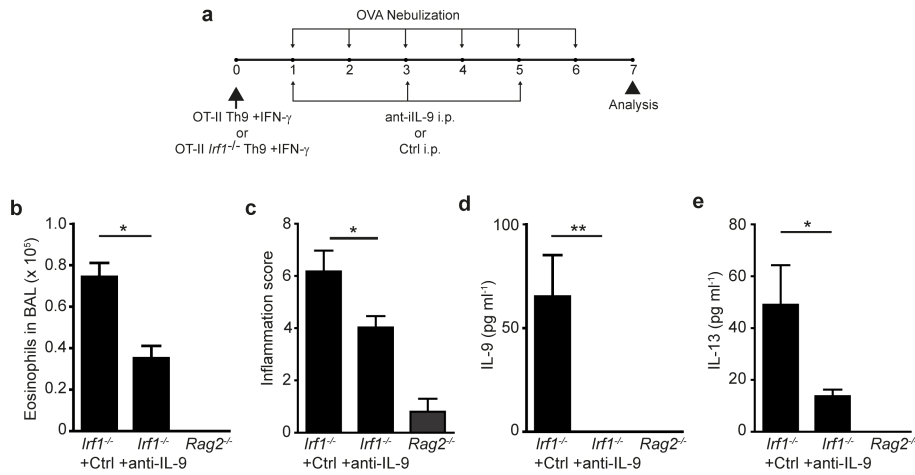

### Supplementary Figure 6. The IFN- $\gamma$ /IRF1 pathway restricts allergic airway inflammation IL-9-dependently.

(a) Purified CD4<sup>+</sup> T cells from WT and *Irf1*<sup>-/-</sup> OTII mice cells were polarized under Th9 conditions with IFN- $\gamma$  for two days, then transferred into *Rag2*<sup>-/-</sup> mice, which were thereafter challenged with nebulized OVA for six days. Some of the recipient mice were treated with IL-9 neutralizing antibodies (anti-IL-9) or control rat IgG (Ctrl) antibodies on the indicated days. Recipient mice were sacrificed 24 h after the last challenge. (b) Cell numbers in the BAL. (c) Tissue inflammation was evaluated with hematoxylin and eosin (H&E) staining. Slides were scored for peribronchial and perivascular inflammation with semiquantitative score from 0 to 10. (d,e) Lung cells were stimulated with 2mM OVA<sub>323-339</sub> for three days. IL-9 and IL-13 production was determined in supernatants by ELISA. (b-e) Data from one representative experiment (n=5 mice per group). The experiments were repeated four times with consistent results. \*p<0.05, \*\*p<0.005 by one-way ANOVA with Tukey's post-test (b,c) or 1-tailed Student's *t* test (d,e).

**Supplementary Table 1. Primers for ChIP and qPCR analyses**

| <b>ChIP primers</b>    | <b>Sequences</b>                                                            | <b>Location (to TSS)</b> |
|------------------------|-----------------------------------------------------------------------------|--------------------------|
| <i>Il9</i> CNS0        | 5'-ATGCGGAATGGGTTTTCACT-3'<br>5'-AAGCTCCACACACTTAGTTTGT-3'                  | -6287 to -6093           |
| <i>Il9</i> CNS1        | 5'-CCCTGTAACCTCACTGTCTATCAGC-3'<br>5'-GCAGGAATTCTGGTTGTGAG-3'               | -375 to -270             |
| <i>Il9</i> CNS2        | 5'-TCACCCACTTTAGTCCTTTCAAAA-3'<br>5'-AATTACAGAATTTTGCCCCAGGTCCTG-3'         | +4888 to +4983           |
| <i>Il9</i> gene        | 5'-TGATTGTACCACACCGTGCT-3'<br>5'-TATCCTTTTCACCCGATGGA-3'                    | +1557 to +1657           |
| <i>Il17</i> promoter   | 5'-GCTCTCCCTGGACTCATGTT-3'<br>5'-TGGTTCTGTGCTGACCTCAT-3'                    | -131 to +74              |
| <i>RpL32</i> promoter  | 5'-TCATTTCTCAGGCACATCTT-3'<br>5'-ACTCACCGTAAAACAGATGG-3'                    | -116 to +56              |
| <i>Irf1</i> promoter   | 5'-TACAACAGCCTGATTTCCCC-3'<br>5'-TACCTCGACGAAGGAGTGGT-3'                    | -104 to +64              |
|                        |                                                                             |                          |
| <b>qRT-PCR primers</b> | <b>Sequences</b>                                                            |                          |
| <i>Spi1</i>            | 5'-AAC AGA TGC ACG TCC TCG AT-3'<br>5'-GGG CTG GGG ACA AGG TTT GAT AAG-3'   |                          |
| <i>Batf</i>            | 5'-GAAGAATCGCATCGCTGC-3'<br>5'-CGTTCTGTTTCTCCAGGT-3'                        |                          |
| <i>Hprt1</i>           | 5'-CTGGTGAAAAGGACCTCTCG-3'<br>5'-TGAAGTACTCATTATAGTCAAGGGCA-3'              |                          |
| <i>IL9</i>             | 5'-CATGCAAACAAGATACCCACTG-3'<br>5'-TTGCCTCTCATCCCTCTCATC-3'                 |                          |
| <i>IFNG</i>            | 5'-TGG GTT CTC TTG GCT GTT ACT G-3'<br>5'-ACA CTC TTT TGG ATG CTC TGG TC-3' |                          |
| <i>IRF1</i>            | 5'-TGGCTGGGACATCAACAAGG-3'<br>5'-CTGCCCTTGTTCTGCTCTG-3'                     |                          |
| <i>IRF4</i>            | 5'-CTCTTTGACACACAGCAGTTCTTG-3'<br>5'-TTCTGGTAAATCGTAGCCCCTC-3'              |                          |

18S

5'-AGTCCCTGCCCTTTGTACACA-3'

5'-GATCCGAGGGCCTCACTAAAC-3'
